# Supplementary material for: Local topological features of robust supply networks
Source: Springer Nature journal article supplement (doi:10.1007/s41109-022-00470-2), 2022-05-20

**Additional Files**

**Supplementary Information**

**Computational complexity**

To compute the robustness, it is necessary to take every edge in the network and compute the demand satisfaction through all product paths. Computing the demand satisfaction takes  $O(M)$ , giving the total complexity of computing the robustness  $O(M^2)$ .

To compute network motifs, it is necessary to count all 3-node subgraphs in the original network, which takes  $O(N^3)$ . Then, the original network needs to be switch-randomized, which takes  $O(M)$  operations, to make sure that every edge has a chance to be switched. The number of randomized networks to create distributions of subgraph counts is usually a constant independent of  $M$  or  $N$ . In our research, we work with networks that have  $M \approx N$ , which gives the total complexity of computing network motifs equal to  $O(N^3M) \approx O(M^4)$ .

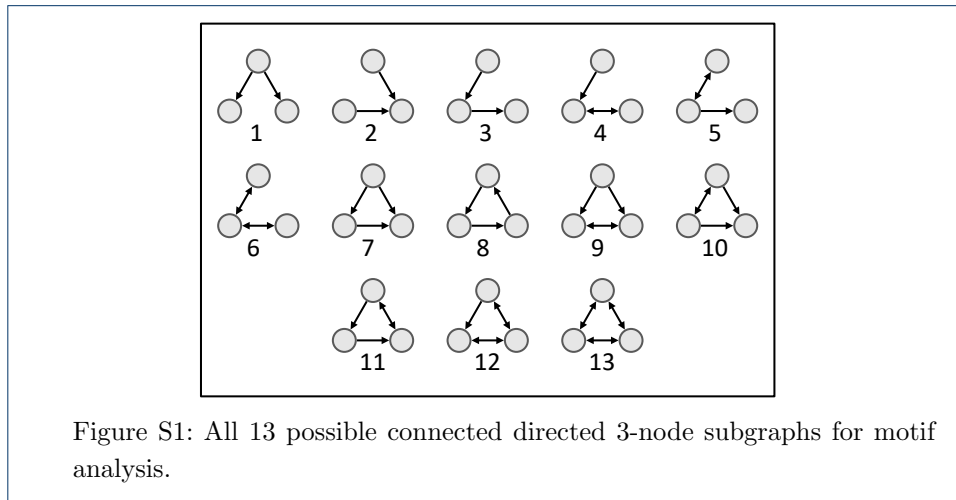

Figure S1: All 13 possible connected directed 3-node subgraphs for motif analysis.

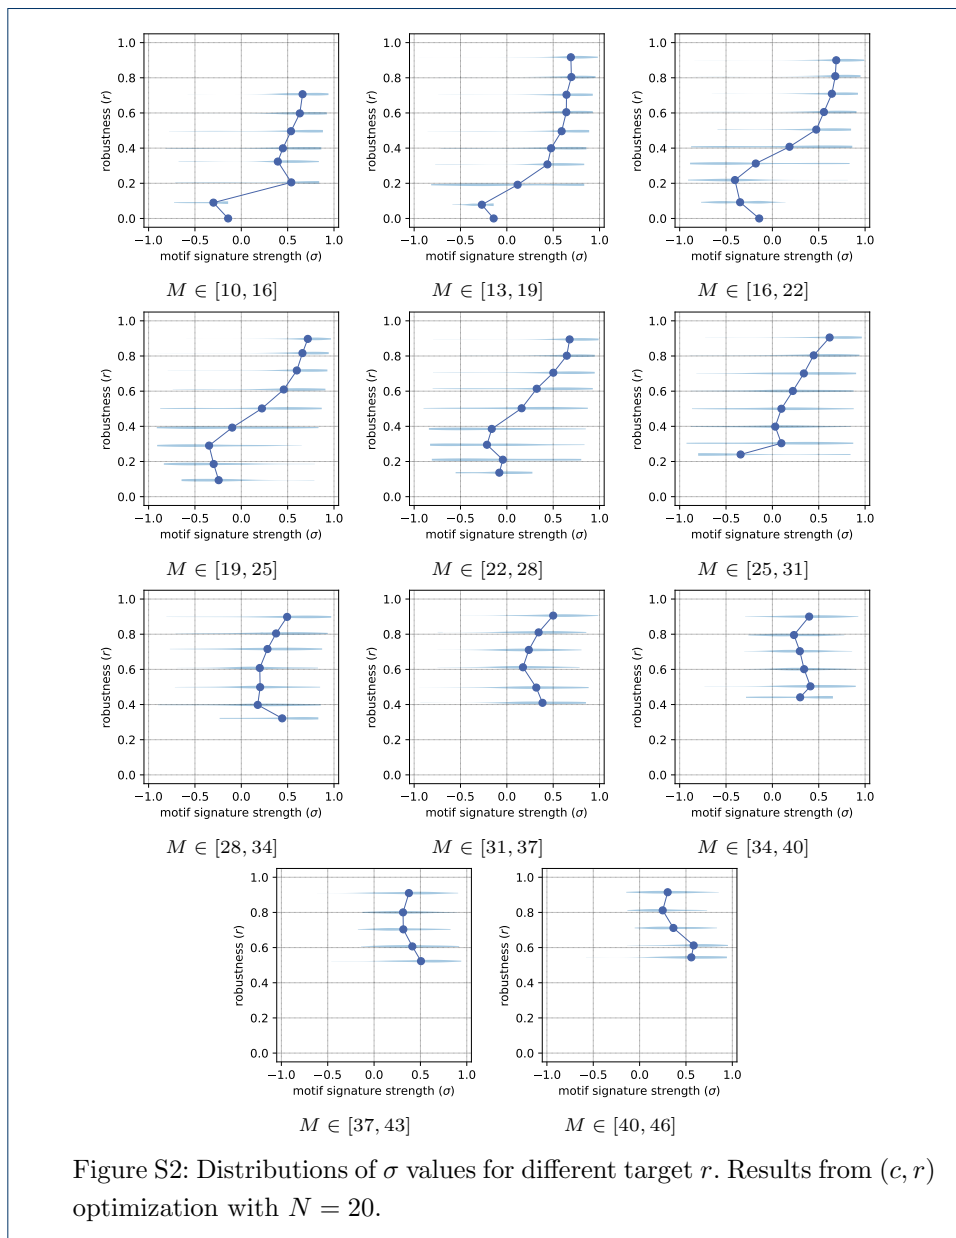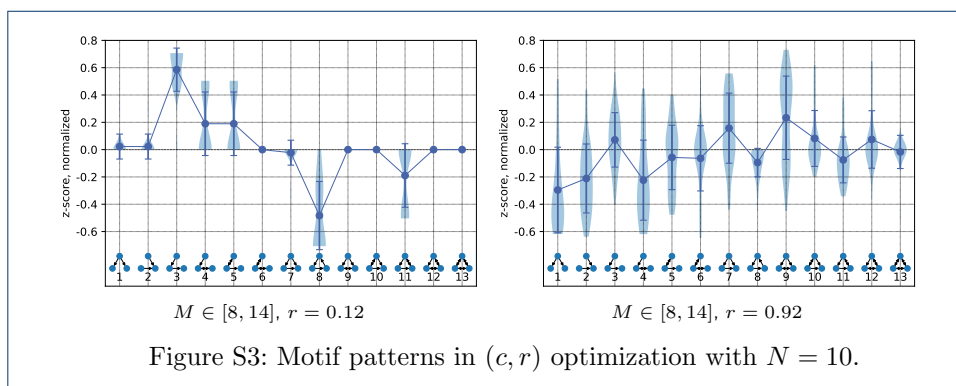

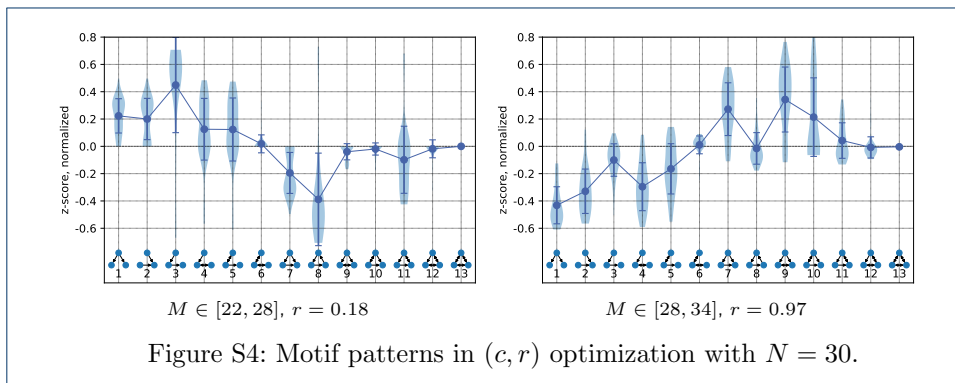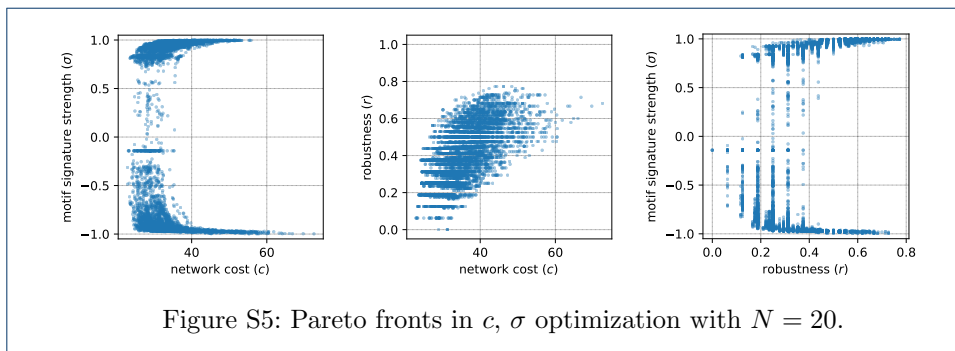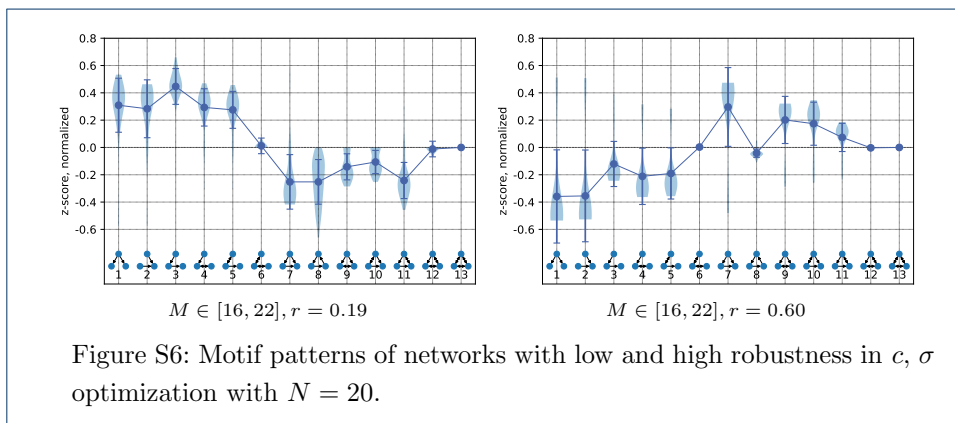

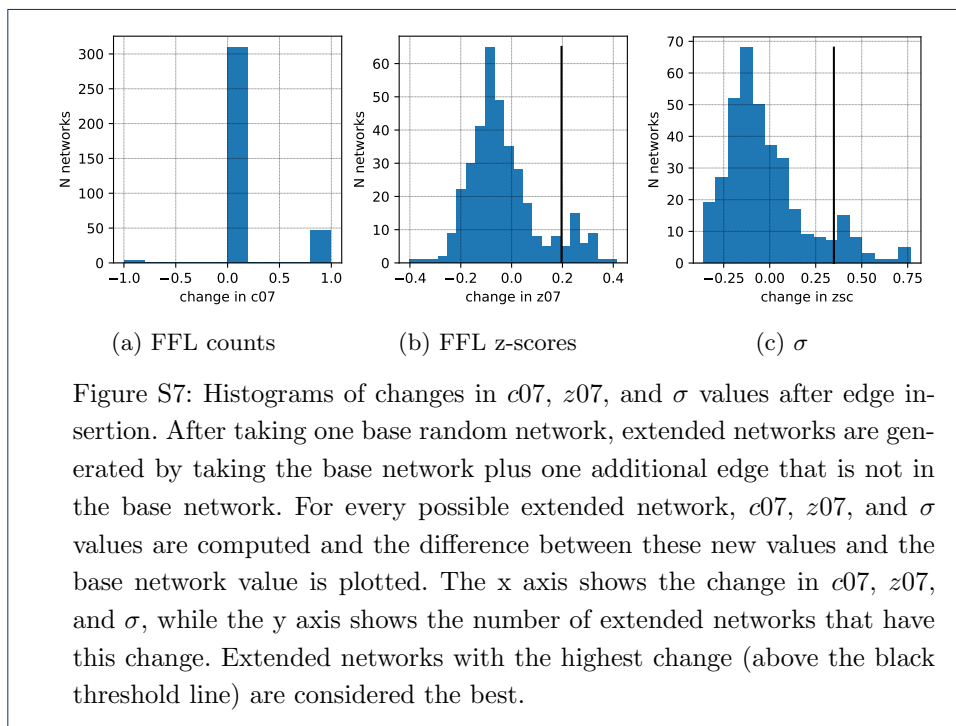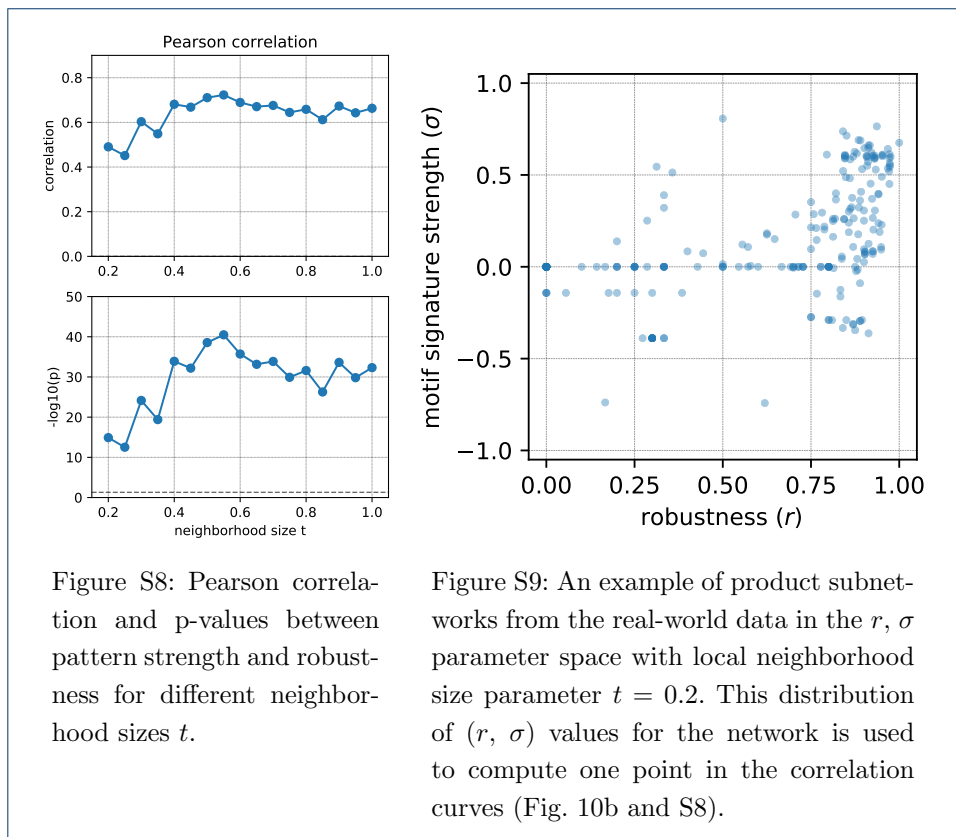

Supplement: 41109_2022_470_MOESM1_ESM.pdf [file 41109_2022_470_MOESM1_ESM.pdf]
